# Supplementary material
Source: MDPI journal article supplement (https://www.mdpi.com/2073-4395/11/5/1019)
Supplement: s1 [file s1]

# Yield Comparisons between Cotton Variety Xin Nong Mian 1 and Its Transgenic *ScALDH21* Lines under Different Water Deficiencies in a Desert-Oasis Ecotone

Honglan Yang <sup>1,2</sup>, Tohir A. Bozorov <sup>1,3</sup>, Xiaoping Chen <sup>4,5</sup>, Dawei Zhang <sup>6</sup>, Jiancheng Wang <sup>1,2</sup>, Xiaoshuang Li <sup>1,2</sup>, Dongwei Gui <sup>4</sup>, Zhiming Qi <sup>7</sup> and Daoyuan Zhang <sup>1,2,\*</sup>

## Supporting information

**Supplemental table 1. Date of irrigation and water volume (mm) for each irrigation strategies used in this study.**

| Year | Irrigation protocols | Date-Volume (mm) |             |             |             |             |             | Total |
|------|----------------------|------------------|-------------|-------------|-------------|-------------|-------------|-------|
| 2016 | FFI                  | 18.05-100.0      | 02.06-166.6 |             |             |             | 17.07-166.6 | 433.3 |
|      | FDI                  | 18.05-75         | 02.06-125.0 |             |             |             | 17.07-125.0 | 325.0 |
|      | SFI                  |                  | 02.06-33.3  | 18.06-33.3  | 02.07-33.3  | 13.07-50.0  | 19.07-33.3  | 266.6 |
|      | SDI                  |                  | 02.06-25.0  | 18.06-25.0  | 02.07-25.0  | 13.07-37.5  | 19.07-25.0  | 200   |
|      | EFI                  |                  | 02.06-66.6  | 18.06-66.6  | 02.07-66.6  |             | 22.07-100.0 | 500   |
|      | EDI                  |                  | 02.06-50.0  | 18.06-50.0  | 02.07-50.0  |             | 22.07-75.0  | 375   |
| 2017 | FFI                  | 13.06-48.9       | 01.07-100.1 | 29.07-66.7  | 13.08-49.3  | 29.08-50.1  | 14.09-50.0  | 365.1 |
|      | FDI                  | 13.06-37.5       | 01.07-75.0  | 29.07-63.4  | 13.08-37.5  | 29.08-37.0  | 14.09-36.9  | 287.3 |
|      | SFI                  | 10.06-77.2       | 10.07-50.8  | 15.08-39.0  | 10.09-66.7  |             |             | 233.7 |
|      | SDI                  | 10.06-55.8       | 10.07-38.4  | 15.08-29.2  | 10.09-50.0  |             |             | 173.3 |
|      | EFI                  | 05.06-133.7      | 29.06-100.6 | 14.07-100.4 | 28.07-101.7 | 27.08-100.0 | 14.09-100.0 | 536.5 |
|      | EDI                  | 05.06-103.3      | 29.06-75.0  | 14.07-75.0  | 28.07-76.7  | 27.08-75.0  | 14.09-75.0  | 405.1 |
| 2018 | FFI                  | 31.05-58.7       | 01.07-44.6  | 14.07-62.1  | 25.07-62.0  | 11.08-58.3  | 29.08-64.3  | 350.0 |
|      | FDI                  | 31.05-43.3       | 01.07-34.2  | 14.07-48.1  | 25.07-45.3  | 11.08-43.7  | 29.08-48.3  | 263.0 |
|      | SFI                  | 31.05-61.2       | 27.06-50.0  | 12.07-44.0  | 10.08-57.0  | 03.09-45.0  |             | 256.9 |
|      | SDI                  | 31.05-45.0       | 27.06-37.5  | 12.07-34.4  | 10.08-42.5  | 03.09-33.3  |             | 192.7 |
|      | EFI                  | 05.06-100.8      | 29.06-100.0 | 14.07-101.0 | 28.07-101.0 | 27.08-101.7 | 29.08-100.0 | 604.2 |
|      | EDI                  | 05.06-76.2       | 29.06-75.0  | 14.07-89.0  | 28.07-74.1  | 27.08-75.0  | 29.08-66.1  | 455.4 |

Full forecast irrigation (FFI); 75% of full forecast irrigation (FDI); full soil moisture irrigation (SFI); 75% of full soil moisture irrigation (SDI); full flood irrigation (EFI); 75% of full flood irrigation (EDI).

**Supplemental table 2. The effects of irrigation level, plant material, irrigation method, and their interaction on the characteristics of cotton phenotype in 2017 and in 2018.**

| Phenotype                      | 2017                |    |        |     |       | 2018                |    |       |     |       |
|--------------------------------|---------------------|----|--------|-----|-------|---------------------|----|-------|-----|-------|
|                                | Source of variation | Df | F      | S   | SS%   | Source of variation | Df | F     | S   | SS%   |
| <b>Plant height</b>            | A                   | 1  | 8.73   | **  | 2.66  | A                   | 1  | 12.29 | *** | 3.77  |
|                                | B                   | 2  | 20.00  | *** | 12.18 | B                   | 2  | 11.23 | *** | 6.89  |
|                                | C                   | 2  | 4.93   | **  | 3.00  | C                   | 2  | 52.66 | *** | 32.31 |
|                                | A:B                 | 2  | 2.91   |     | 1.77  | A:B                 | 2  | 4.03  |     | 2.48  |
|                                | A:C                 | 2  | 4.11   | *   | 2.50  | A:C                 | 2  | 11.66 | *   | 7.15  |
|                                | B:C                 | 4  | 13.45  | *** | 16.38 | B:C                 | 4  | 1.33  | *** | 1.63  |
|                                | A:B:C               | 4  | 1.00   |     | 1.22  | A:B:C               | 4  | 1.3   |     | 1.59  |
| <b>Leaf area</b>               | A                   | 1  | 0.68   |     | 0.68  | A                   | 1  | 2.37  |     | 1.60  |
|                                | B                   | 2  | 8.44   | *** | 16.87 | B                   | 2  | 6.08  | **  | 8.21  |
|                                | C                   | 2  | 7.56   | **  | 15.11 | C                   | 2  | 19.64 | *** | 26.53 |
|                                | A:B                 | 2  | 0.72   |     | 1.44  | A:B                 | 2  | 2.46  |     | 3.32  |
|                                | A:C                 | 2  | 4.40   | *   | 8.78  | A:C                 | 2  | 3.57  | *   | 4.82  |
|                                | B:C                 | 4  | 2.34   |     | 9.36  | B:C                 | 4  | 1.18  |     | 3.19  |
|                                | A:B:C               | 4  | 2.95   | *   | 11.79 | A:B:C               | 4  | 1.37  |     | 3.70  |
| <b>Net photosynthetic rate</b> | A                   | 1  | 0.65   |     | 0.35  | A                   | 1  | 1.05  |     | 0.38  |
|                                | B                   | 2  | 8.67   | *** | 9.63  | B                   | 2  | 10.10 | *** | 8.05  |
|                                | C                   | 2  | 2.97   |     | 3.30  | C                   | 2  | 3.75  | *   | 2.75  |
|                                | A:B                 | 2  | 2.21   |     | 2.45  | A:B                 | 2  | 10.85 | *** | 7.96  |
|                                | A:C                 | 2  | 3.42   | *   | 3.80  | A:C                 | 2  | 3.20  | *   | 2.34  |
|                                | B:C                 | 4  | 4.21   | **  | 9.34  | B:C                 | 4  | 2.25  |     | 3.29  |
|                                | A:B:C               | 4  | 0.53   |     | 1.18  | A:B:C               | 4  | 1.75  |     | 2.56  |
| <b>Chlorophyll content</b>     | A                   | 1  | 29.06  | *** | 7.49  | A                   | 1  | 0.85  |     | 0.65  |
|                                | B                   | 2  | 49.69  | *** | 25.60 | B                   | 2  | 4.24  | *   | 6.49  |
|                                | C                   | 2  | 14.56  | *** | 7.50  | C                   | 2  | 15.98 | *** | 24.46 |
|                                | A:B                 | 2  | 0.90   |     | 0.46  | A:B                 | 2  | 0.37  |     | 0.57  |
|                                | A:C                 | 2  | 5.02   | **  | 2.58  | A:C                 | 2  | 1.25  |     | 1.91  |
|                                | B:C                 | 4  | 4.03   | **  | 4.15  | B:C                 | 4  | 0.66  |     | 2     |
|                                | A:B:C               | 4  | 1.17   | *** | 1.21  | A:B:C               | 4  | 2.88  | *   | 8.81  |
| <b>Cotton yield</b>            | A                   | 1  | 385.59 | *** | 14.93 | A                   | 1  | 0.99  |     | 0.69  |
|                                | B                   | 2  | 438.53 | *** | 33.95 | B                   | 2  | 5.49  | **  | 7.63  |
|                                | C                   | 2  | 382.84 | *** | 29.64 | C                   | 2  | 18.10 | *** | 25.15 |
|                                | A:B                 | 2  | 15.25  | *** | 1.18  | A:B                 | 2  | 1.59  |     | 2.21  |
|                                | A:C                 | 2  | 57.31  | *** | 4.44  | A:C                 | 2  | 15.32 | *** | 21.29 |
|                                | B:C                 | 4  | 58.32  | *** | 9.03  | B:C                 | 4  | 0.66  |     | 1.82  |
|                                | A:B:C               | 4  | 35.09  | *** | 5.42  | A:B:C               | 4  | 1.33  |     | 3.69  |
| <b>Seed yield</b>              | A                   | 1  | 131.16 | *** | 14.04 | A                   | 1  | 15.78 | *** | 14.74 |
|                                | B                   | 2  | 163.92 | *** | 35.09 | B                   | 2  | 8.47  | *** | 15.84 |
|                                | C                   | 2  | 133.81 | *** | 28.64 | C                   | 2  | 4.65  | *   | 8.70  |
|                                | A:B                 | 2  | 4.97   | *   | 1.06  | A:B                 | 2  | 0.12  |     | 0.22  |
|                                | A:C                 | 2  | 21.56  | *** | 4.61  | A:C                 | 2  | 2.36  |     | 4.41  |
|                                | B:C                 | 4  | 22.02  | *** | 9.43  | B:C                 | 4  | 1.16  |     | 4.32  |
|                                | A:B:C               | 4  | 12.16  | *** | 5.20  | A:B:C               | 4  | 0.35  |     | 1.30  |

|                       |       |   |        |     |       |       |   |       |     |       |
|-----------------------|-------|---|--------|-----|-------|-------|---|-------|-----|-------|
| <b>Fiber yield</b>    | A     | 1 | 158.71 | *** | 13.64 | A     | 1 | 1.87  |     | 1.96  |
|                       | B     | 2 | 196.74 | *** | 33.82 | B     | 2 | 7.33  | **  | 15.30 |
|                       | C     | 2 | 190.62 | *** | 32.77 | C     | 2 | 5.69  | **  | 11.89 |
|                       | A:B   | 2 | 4.31   | *   | 0.74  | A:B   | 2 | 1.02  |     | 2.12  |
|                       | A:C   | 2 | 20.31  | *** | 3.49  | A:C   | 2 | 3.18  | *   | 6.64  |
|                       | B:C   | 4 | 24.90  | *** | 8.56  | B:C   | 4 | 0.43  |     | 1.81  |
|                       | A:B:C | 4 | 15.76  | *** | 5.42  | A:B:C | 4 | 0.93  |     | 3.86  |
| <b>Fiber length</b>   | A     | 1 | 0.12   |     | 0.06  | A     | 1 | 0.50  |     | 0.73  |
|                       | B     | 2 | 68.38  | *** | 79.34 | B     | 2 | 10.04 | *** | 29.56 |
|                       | C     | 2 | 1.45   |     | 1.68  | C     | 2 | 2.59  |     | 7.62  |
|                       | A:B   | 2 | 0.93   |     | 1.08  | A:B   | 2 | 0.12  |     | 0.34  |
|                       | A:C   | 2 | 1.36   |     | 1.58  | A:C   | 2 | 0.87  |     | 2.57  |
|                       | B:C   | 4 | 0.73   |     | 1.68  | B:C   | 4 | 0.69  |     | 4.09  |
|                       | A:B:C | 4 | 1.77   |     | 4.12  | A:B:C | 4 | 0.35  |     | 2.08  |
| <b>Fiber strength</b> | A     | 1 | 3.25   |     | 4.58  | A     | 1 | 0.01  |     | 0.02  |
|                       | B     | 2 | 12.14  | *** | 34.22 | B     | 2 | 1.07  |     | 3.80  |
|                       | C     | 2 | 7.60   | **  | 21.43 | C     | 2 | 2.44  |     | 8.66  |
|                       | A:B   | 2 | 1.14   |     | 3.21  | A:B   | 2 | 4.24  | *   | 15.05 |
|                       | A:C   | 2 | 0.09   |     | 0.24  | A:C   | 2 | 1.39  |     | 4.94  |
|                       | B:C   | 4 | 0.77   |     | 4.36  | B:C   | 4 | 0.16  |     | 1.15  |
|                       | A:B:C | 4 | 1.17   |     | 6.59  | A:B:C | 4 | 0.34  |     | 2.44  |

A, Two irrigation levels (full, deficit); B, Three cotton lines (NT, L16, L38); C, Three irrigation protocols (flood, forecast, and soil moisture).

S, Significant difference

Different number of asterisks indicate significant differences among factors following Duncan's multiple range tests at the '\*\*\*\*' 0.1%, '\*\*\*' 1% and '\*\*' 5% level.

**Supplemental Table 3. Effects of treatments on morphological, physiological and yield traits of cotton from three years.**

| Traits                                                                         | Line | Irrigation treatments      |                           |                           |                           |                           |                           |
|--------------------------------------------------------------------------------|------|----------------------------|---------------------------|---------------------------|---------------------------|---------------------------|---------------------------|
|                                                                                |      | FFI                        | FDI                       | SFI                       | SDI                       | EFI                       | EDI                       |
| Plant height<br>(cm)                                                           | NT   | 51.1±5.7 <sup>de</sup>     | 49.3±6.0 <sup>e</sup>     | 49.9±5.0 <sup>e</sup>     | 44.6±6.2 <sup>e</sup>     | 54.4±7.0 <sup>d</sup>     | 62.7±7.6 <sup>bc</sup>    |
|                                                                                | L16  | 65.2±10.5 <sup>bc</sup>    | 58.1±7.8 <sup>cd</sup>    | 63.0±4.8 <sup>bc</sup>    | 55.5±5.5 <sup>d</sup>     | 70.1±12.0 <sup>a</sup>    | 66.5±5.8 <sup>ab</sup>    |
|                                                                                | L38  | 62.3±7.8 <sup>c</sup>      | 58.7±8.5 <sup>cd</sup>    | 63.9±8.0 <sup>b</sup>     | 56.3±8.3 <sup>cd</sup>    | 60.4±3.7 <sup>c</sup>     | 65.6±8.1 <sup>b</sup>     |
| Leaf area (cm <sup>2</sup> )                                                   | NT   | 48.1±6.5 <sup>c</sup>      | 52.2±5.0 <sup>bc</sup>    | 54.6±3.2 <sup>c</sup>     | 39.9±5.5 <sup>d</sup>     | 56.1±3.0 <sup>b</sup>     | 75.0±0.7 <sup>a</sup>     |
|                                                                                | L16  | 62.4±0.2 <sup>b</sup>      | 58.9±3.0 <sup>bc</sup>    | 66.0±3.3 <sup>bc</sup>    | 56.6±3.4 <sup>b</sup>     | 72.4±3.8 <sup>a</sup>     | 83.4±3.7 <sup>a</sup>     |
|                                                                                | L38  | 63.1±5.2 <sup>ab</sup>     | 59.8±3.1 <sup>b</sup>     | 66.5±2.1 <sup>dc</sup>    | 64.7±3.5 <sup>b</sup>     | 70.6±9.2 <sup>a</sup>     | 75.6±0.8 <sup>a</sup>     |
| Chlorophyll<br>(SPAD)                                                          | NT   | 48.5±0.4 <sup>a</sup>      | 52.5±1.1 <sup>c</sup>     | 53.3±0.3 <sup>b</sup>     | 55.1±1.6 <sup>b</sup>     | 50.0±0.3 <sup>d</sup>     | 50.5±0.6 <sup>d</sup>     |
|                                                                                | L16  | 51.8±0.3 <sup>bc</sup>     | 54.2±2.0 <sup>bc</sup>    | 55.4±1.5 <sup>a</sup>     | 60.6±2.5 <sup>a</sup>     | 50.8±0.8 <sup>d</sup>     | 51.8±1.4 <sup>bcd</sup>   |
|                                                                                | L38  | 49.2±1.6 <sup>d</sup>      | 52.5±0.9 <sup>cd</sup>    | 52.1±0.6 <sup>dc</sup>    | 52.1±0.2 <sup>bc</sup>    | 47.7±0.6 <sup>c</sup>     | 48.6±0.6 <sup>dc</sup>    |
| Net biosynthesis<br>(μmol CO <sub>2</sub> m <sup>-2</sup><br>s <sup>-1</sup> ) | NT   | 29.0±1.1 <sup>bc</sup>     | 28.4±2.0 <sup>c</sup>     | 28.9±1.4 <sup>bc</sup>    | 30.3±1.5 <sup>b</sup>     | 27.9±0.1 <sup>c</sup>     | 29.4±1.4 <sup>b</sup>     |
|                                                                                | L16  | 30.3±1.0 <sup>ab</sup>     | 31.0±0.9 <sup>a</sup>     | 31.5±1.2 <sup>a</sup>     | 31.6±0.5 <sup>a</sup>     | 29.8±1.8 <sup>b</sup>     | 29.7±1.3 <sup>b</sup>     |
|                                                                                | L38  | 30.5±1.2 <sup>ab</sup>     | 29.8±1.7 <sup>b</sup>     | 29.6±2.5 <sup>b</sup>     | 27.6±1.9 <sup>c</sup>     | 30.6±1.1 <sup>ab</sup>    | 30.1±1.5 <sup>b</sup>     |
| Photosynthetic<br>WUE (μmol<br>CO <sub>2</sub> mmol H <sub>2</sub> O)          | NT   | 48.3±0.6 <sup>bc</sup>     | 51.9±1.7 <sup>d</sup>     | 53.5±0.5 <sup>g</sup>     | 54.3±2.4 <sup>g</sup>     | 49.8±0.5 <sup>c</sup>     | 50.2±1.0 <sup>fg</sup>    |
|                                                                                | L16  | 51.9±0.4 <sup>a</sup>      | 53.2±3.0 <sup>c</sup>     | 54.7±2.3 <sup>f</sup>     | 59.3±3.7 <sup>e</sup>     | 50.4±1.2 <sup>b</sup>     | 51.1±2.1 <sup>f</sup>     |
|                                                                                | L38  | 48.4±2.4 <sup>abcd</sup>   | 52.1±1.4 <sup>d</sup>     | 51.8±0.8 <sup>g</sup>     | 52.0±0.3 <sup>g</sup>     | 48.1±1.0 <sup>c</sup>     | 48.3±0.9 <sup>fg</sup>    |
| Boll number<br>(per plant)                                                     | NT   | 7.0±0.4 <sup>d</sup>       | 8.2±0.6 <sup>d</sup>      | 7.7±0.2 <sup>d</sup>      | 6.5±0.7 <sup>d</sup>      | 8.8±0.4 <sup>c</sup>      | 7.6±0.8 <sup>cd</sup>     |
|                                                                                | L16  | 11.0±1.4 <sup>abc</sup>    | 9.6±0.3 <sup>b</sup>      | 11.0±0.5 <sup>b</sup>     | 7.7±0.9 <sup>cd</sup>     | 9.7±0.9 <sup>b</sup>      | 12.2±1.1 <sup>a</sup>     |
|                                                                                | L38  | 9.8±0.4 <sup>b</sup>       | 9.5±1.0 <sup>bd</sup>     | 10.7±0.4 <sup>b</sup>     | 9.0±0.3 <sup>cd</sup>     | 10.6±1.0 <sup>b</sup>     | 8.8±1.3 <sup>bc</sup>     |
| Cotton yield<br>(kg hectare <sup>-1</sup> )                                    | NT   | 3384.7±493.0 <sup>f</sup>  | 3227.4±339.4 <sup>f</sup> | 2830.0±465.4 <sup>h</sup> | 1586.6±114.5 <sup>j</sup> | 3025.9±673.6 <sup>f</sup> | 2342.5±444.7 <sup>f</sup> |
|                                                                                | L16  | 5528.8±262.1 <sup>a</sup>  | 4492.1±461.0 <sup>d</sup> | 4270.9±844.3 <sup>d</sup> | 2777.4±37.3 <sup>i</sup>  | 4837.9±741.5 <sup>b</sup> | 3821.7±288.6 <sup>b</sup> |
|                                                                                | L38  | 4973.1±1033.9 <sup>b</sup> | 4758.8±779.1 <sup>c</sup> | 4348.5±390.0 <sup>c</sup> | 3040.9±284.9 <sup>f</sup> | 4413.4±663.9 <sup>c</sup> | 2964.1±644.6 <sup>c</sup> |
| Water use<br>efficiency<br>(kg m <sup>-3</sup> )                               | NT   | 0.7±0.2 <sup>d</sup>       | 0.9±0.2 <sup>bd</sup>     | 0.8±0.3 <sup>c</sup>      | 0.6±0.2 <sup>cd</sup>     | 0.4±0.1 <sup>e</sup>      | 0.4±0.1 <sup>d</sup>      |
|                                                                                | L16  | 1.2±0.1 <sup>a</sup>       | 1.3±0.2 <sup>ab</sup>     | 1.2±0.5 <sup>ab</sup>     | 1.0±0.2 <sup>abc</sup>    | 0.7±0.1 <sup>d</sup>      | 0.7±0.1 <sup>c</sup>      |
|                                                                                | L38  | 1.1±0.3 <sup>b</sup>       | 1.4±0.4 <sup>ab</sup>     | 1.2±0.3 <sup>ab</sup>     | 1.1±0.3 <sup>abc</sup>    | 0.6±0.1 <sup>d</sup>      | 0.5±0.1 <sup>cd</sup>     |

Full forecast irrigation (FFI); 75% of full forecast irrigation (FDI); full soil moisture irrigation (SFI); 75% of full soil moisture irrigation (SDI); full flood irrigation (EFI); 75% of full flood irrigation (EDI). Different letters indicate significant differences between transgenic lines and NT of the year following Duncan's multiple range tests at the 5% level of significance.
